# Supplementary material
Source: PubMed Central journal article supplement (PMC2937498)
Supplement: supp_76_18_6101__1.pdf [file supp_76_18_6101__1.pdf]

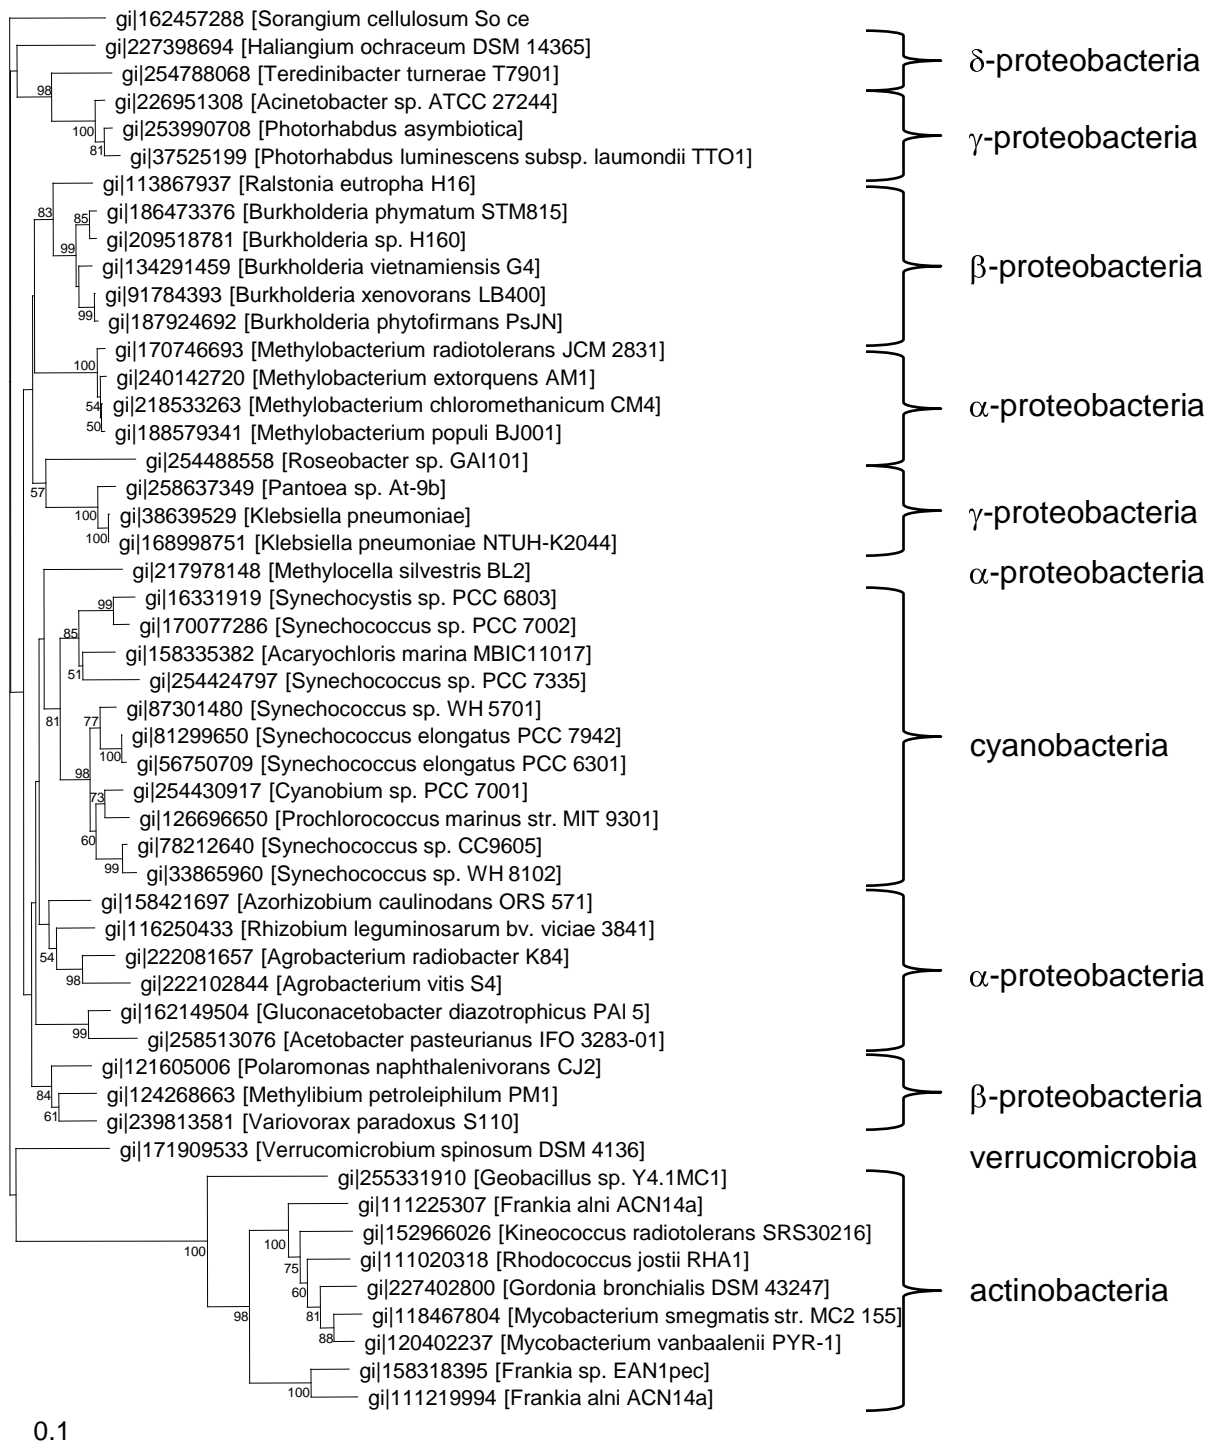

**Supplement 1:** Protein neighbour-joining tree for SII0783 homologues, indicated with gi numbers, from known bacteria containing the SII0783 homologues (Species name in parentheses). On the right side the major bacterial kingdoms are shown. The tree was constructed from an alignment using Clustal X v2.0.11. Bootstrap values are given at nodes if at least 50.
