# Supplementary material
Source: PubMed Central journal article supplement (PMC2937498)
Supplement: supp_76_18_6101__2.pdf [file supp_76_18_6101__2.pdf]

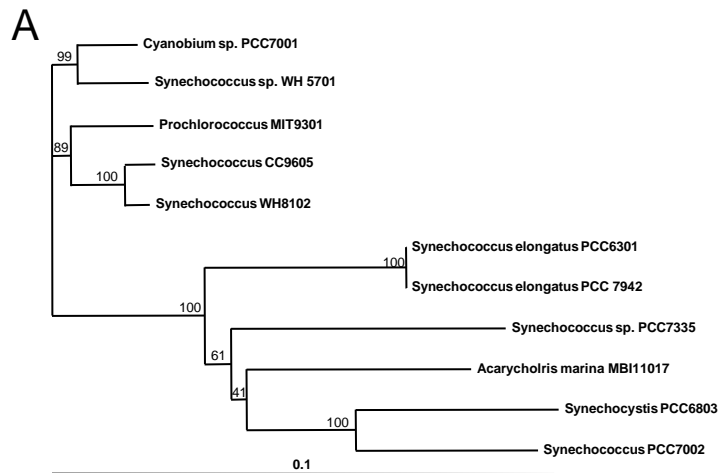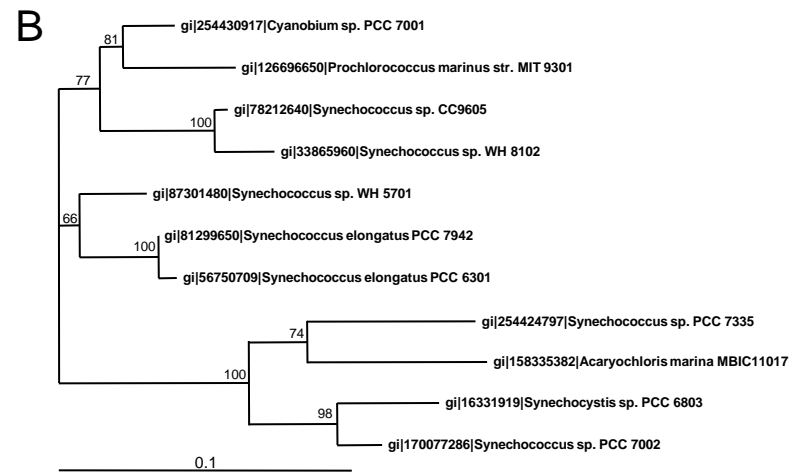

**Supplement 2:** (A) 16S rRNA neighbour-joining tree from known cyanobacteria containing the *sll0783* gene cluster. (B) Protein neighbour-joining tree for Sll0783-homologues from known cyanobacteria containing the *sll0783* gene cluster. Trees were constructed from alignments using Clustal X v2.0.11. Bootstrap values are given at nodes if at least 50.
