# Supplementary material
Source: PubMed Central journal article supplement (PMC2937498)
Supplement: supp_76_18_6101__3.pdf [file supp_76_18_6101__3.pdf]

## A

|                                         |                                                                                                                      |
|-----------------------------------------|----------------------------------------------------------------------------------------------------------------------|
| <i>Synechococcus</i> PCC7002            | TTAACT <b>GTA</b> AGACCCGCT <b>TCA</b> ...N <sub>23</sub> ... <b>TAC</b> CGATCC N <sub>326</sub> <b>ATG</b>          |
| <i>Prochlorococcus marinus</i> MIT 9301 | AATTT <b>GGTG</b> ATATCGGT <b>TAC</b> ...N <sub>20</sub> ... <b>CAGAGA</b> ATGTTCTAAGTTTTTTTAAATTTTC <b>ATG</b>      |
| <i>Synechococcus elongatus</i> PCC7942  | TATTT <b>AGTAG</b> TCACCGT <b>TAC</b> ...N <sub>20</sub> ... <b>TAGTTA</b> ATTG...N <sub>46</sub> ... <b>ATG</b>     |
| <i>Synechococcus</i> WH8102             | TGTGTT <b>GTAG</b> CCAAGGCC <b>CAC</b> ...N <sub>23</sub> ... <b>TCAT</b> CCAGTTT...N <sub>71</sub> ... <b>ATG</b>   |
| <i>Acaryochloris marina</i> MBIL11017   | GGCTGC <b>GTA</b> CCCCCTTAA <b>TAC</b> ...N <sub>24</sub> ... <b>TAAGA</b> AGCCTCA...N <sub>273</sub> ... <b>ATG</b> |

## B

|                |                           |                                                   | -35             | -10                 | +1                          |
|----------------|---------------------------|---------------------------------------------------|-----------------|---------------------|-----------------------------|
| <i>sll0783</i> | <b>AGAT</b> AATCTTCA      | <b>TACA</b> . . . . N <sub>59</sub> . . . TGATACA | N <sub>21</sub> | TA N <sub>3</sub> T | GATACATGA                   |
| <i>glnA</i>    | <b>TGTA</b> TCAGCTGT      | <b>TACA</b> . . . . . N <sub>22</sub> . . . . .   |                 | TA N <sub>3</sub> T | GGATAGTCG                   |
|                | <b>GTA</b> N <sub>8</sub> | <b>TAC</b> N <sub>22</sub>                        |                 | TA N <sub>3</sub> T | N <sub>4-5</sub> <u>tsp</u> |

**Supplement 3:** (A) Putative NtcA binding sites in the upstream region of *sll0783* homologues in cyanobacteria containing this gene cluster. Startcodon is marked in red. Nucleotides matching those of the GTA and TAC triplets of the NtcA recognition motif are boldface. (B) Sequence of 5' end of *sll0783* transcript. Total RNA from nitrogen-starved *Synechocystis* wild-type cells was isolated and analysed by using the 5'RACE method. Sequencing the cDNA revealed the 5'end of the *sll0783*-transcript (+1), indicating a potential transcription start site (tsp). The potential NtcA recognition site upstream of the tsp is aligned to the NtcA binding site in the promoter of the *glnA* gene (*slr1765*). Below, the consensus canonical NtcA binding sequence is shown. The putative NtcA-binding motif is highlighted in bold and the possible tsp is underlined.
